# Supplementary material for: Cross-Licensing in a Supply Chain with Asymmetric Manufacturers
Source: Atypon-hosted journal article supplement (doi:10.1287/msom.2019.0477), 2023-06-01
Supplement: msom.2019.0477.sm1.pdf [file msom.2019.0477.sm1.pdf]

## Appendix. Proofs

**Proof of Proposition 1.** By comparing (3) to (4), one can obtain the desired result.  $\square$

**Proof of Lemma 1.** For given levels of innovation  $T_1$  and  $T_2$ , we obtain the supplier's optimal prices for a duopoly and a monopoly by solving the first order condition of (3). Then, the supplier's optimal profits can be expressed as follows:

$$\pi_s^*(T_1, T_2) = \begin{cases} \frac{1}{24}(2 + (T_1 + T_2)(1 + \beta))^2, & \text{for a duopoly,} \\ \frac{1}{8}(1 + \beta T_1 + T_2)^2, & \text{for a monopoly.} \end{cases}$$

Next, we compare the supplier's optimal profits to derive the condition for the optimal downstream structure. The supplier will induce a duopoly if  $\frac{1}{\sqrt{24}}(2 + (T_1 + T_2)(1 + \beta)) \geq \frac{1}{\sqrt{8}}(1 + \beta T_1 + T_2)$ , which is equivalent to  $\sqrt{3} - 2 + T_1(\beta(\sqrt{3} - 1) - 1) \leq (1 + \beta - \sqrt{3})T_2$ . The left-hand side is negative for  $\beta \in [0, 1]$ . If  $\beta \geq \sqrt{3} - 1$ , then the right-hand side is positive and the inequality holds for all  $T_1$  and  $T_2$ . Otherwise, the inequality holds for  $T_2 \leq \frac{\sqrt{3}-2+T_1(\beta(\sqrt{3}-1)-1)}{(1+\beta-\sqrt{3})}$ .  $\square$

**Proof of Proposition 2.** We first prove that the monopoly is not feasible. Let  $T_2^m$  be  $M_2$ 's innovation investment under its monopoly, i.e.,  $r = r_m$ ,  $T_1 = 0$ , and  $q_1 = 0$ . By optimizing  $M_2$ 's profit function with respect to  $T_2$ , one can obtain  $T_2^m = \frac{1}{16k_2 - 1}$ . According to Lemma 1,  $T_2^m > \hat{T}_2(0|\beta)$  and  $\beta < \sqrt{3} - 1$  for the supplier to choose a monopoly. That is,

$$\begin{aligned} \frac{1}{16k_2 - 1} &> \frac{2 - \sqrt{3}}{\sqrt{3} - 1 - \beta} \\ &\equiv k_2 < \frac{1}{2 - \sqrt{3}} \frac{1}{16}. \end{aligned}$$

However, there is no such  $k_2$  for  $\frac{49}{144} < k_2$ , resulting in no monopoly.

Next, we derive the equilibrium outcomes in a duopoly. Let  $T_i(T_j)$  be  $M_i$ 's best innovation investment response to  $M_j$ 's investment  $T_j$ . We define  $T_i^I$  as  $M_i$ 's innovation investment under a duopoly by solving both manufacturers' first order conditions simultaneously, which can be expressed as follows:

$$T_i^I = \frac{(5\beta - 7)(-5\beta^2 + 12\beta + 12k_j - 7)}{6k_j((7 - 5\beta)^2 - 144k_i) + (7 - 5\beta)^2(\beta^2 + 6k_i - 1)}.$$

By substituting  $T_i$  with  $T_i^*$ , we derive the supplier's profit as  $\pi_s^I(\beta) = \frac{216((\beta-1)(5\beta-7)k_2+k_1((\beta-1)(5\beta-7)-24k_2))^2}{((7-5\beta)^2(\beta^2+6k_2-1)+6k_1((7-5\beta)^2-144k_2))^2}$ .

If  $T_2^I < \hat{T}_2(T_1^I|\beta)$ , then  $T_2^* = T_2^I$ . Otherwise,  $M_2$  will invest  $T_2^B = \hat{T}_2(T_1(T_2)|\beta)$ , which is

$$T_2^B = \frac{48(2\sqrt{3} - 3)k_1 - (4\sqrt{3} - 7)(\beta - 1)(5\beta - 7)}{(4\sqrt{3} - 7)(\beta - 1)(\beta + 1)(5\beta - 7) - 48(\sqrt{3}\beta + \sqrt{3} - 3)k_1}.$$

Then,  $M_1$ 's investment becomes

$$\begin{aligned} T_1^B &= T_1(T_2^B) \\ &= -\frac{(4\sqrt{3} - 7)(\beta - 1)(5\beta - 7)}{(4\sqrt{3} - 7)(\beta - 1)(\beta + 1)(5\beta - 7) - 48(\sqrt{3}\beta + \sqrt{3} - 3)k_1}. \end{aligned}$$

Thus, the supplier's profit in this case is  $\pi_s^B(\beta) = \frac{864(\beta-1)^2k_1^2}{((4\sqrt{3}-7)(\beta-1)(\beta+1)(5\beta-7)-48(\sqrt{3}\beta+\sqrt{3}-3)k_1)^2}$ .

Next, by solving  $T_2^I = T_2^B$ , we obtain

$$\hat{k}_2(k_1|\beta) = -\frac{(4\sqrt{3}-5)(\beta-1)(5\beta-7)k_1}{(4\sqrt{3}-7)(\beta-1)(5\beta-7)+48(3-2\sqrt{3})k_1}.$$

If  $k_2 < \hat{k}_2(k_1|\beta)$ , then  $T_i^* = T_i^B$ . Otherwise,  $T_i^* = T_i^I$ .

As we assume  $\frac{49}{144} < k_2$ , the condition for the boundary duopoly is  $\frac{49}{144} < k_2 < \hat{k}_2(k_1|\beta)$ . We verify that  $\frac{\partial \hat{k}_2(k_1|\beta)}{\partial \beta} < 0$  and  $\hat{k}_2(k_1|1) = 0$ , leading  $\hat{k}_2(k_1|\beta)$  to decrease in  $\beta$  to zero. Therefore, if  $\beta$  is too large,  $\hat{k}_2(k_1|\beta)$  cannot be greater than  $\frac{49}{144}$ , violating the condition. Solving the inequality  $k_2 < \hat{k}_2(k_1|\beta)$  for  $\beta$ , we obtain  $\beta < \hat{\beta}(k_1, k_2)$ , where  $\hat{\beta}(k_1, k_2) = \frac{6}{5} - \frac{1}{5} \sqrt{\frac{720(\sqrt{3}-2)k_1k_2 + (5\sqrt{3}-12)k_1 + (7\sqrt{3}-12)k_2}{(5\sqrt{3}-12)k_1 + (7\sqrt{3}-12)k_2}}$ .  $\square$

**Proof for Proposition 3.** The results follow by substituting  $\beta = 0$  into the results in Proposition 2.  $\square$

**Proof of Proposition 4.** Recall that the supplier's profit in equilibrium committing not to enforcing cross-licensing can be derived from Proposition 2 by setting  $\beta$  to 0. We are interested in seeking conditions under which the supplier is better off with cross-licensing compared to that without cross-licensing, i.e.,  $\pi_s^*(0) < \pi_s^*(\beta)$ . Recall that  $\hat{k}_2(k_1|\beta)$  is decreasing in  $\beta$ . Thus, there are three cases; (1)  $k_2 < \hat{k}_2(k_1|\beta)$ , (2)  $\hat{k}_2(k_1|\beta) \leq k_2 < \hat{k}_2(k_1|0)$ , and (3)  $\hat{k}_2(k_1|0) \leq k_2$ . We analyze each case sequentially.

(i) Consider that  $\frac{49}{144} < k_2 < \hat{k}_2(k_1|\beta)$ . In this region, the equilibrium outcome is always boundary duopoly, i.e.,  $\pi_s = \pi_s^B$  regardless of the cross-licensing decision. We can verify that  $\pi_s^B(\beta) \geq \pi_s^B(0)$  in this region. That is, cross-licensing is always better for the supplier.

Since  $\hat{k}_2(k_1|\beta)$  is decreasing in  $\beta$  to zero,  $\frac{49}{144} < k_2 < \hat{k}_2(k_1|\beta)$  does not hold for a large enough  $\beta$ .

(ii) Next, suppose that  $\hat{k}_2(k_1|\beta) \leq k_2 < \hat{k}_2(k_1|0)$ . Then, the supplier's profit is  $\pi_s^B$  without cross-licensing but  $\pi_s^I$  with cross-licensing. Although the profit functions are quite complicated, we note that they have a positive square root. We compare the positive square roots of  $\pi_s^I(\beta)$  to  $\pi_s^B(0)$  to obtain a threshold value for  $k_2$ .

First, we note that while  $\pi_s^I(\beta)$  is decreasing in  $k_1$  and  $k_2$ ,  $\pi_s^B(0)$  is decreasing in  $k_1$  but constant in  $k_2$ . This implies that if  $\pi_s^B(0) < \pi_s^I(\beta)|_{k_2=k_1}$ , then  $\pi_s^B(0) < \pi_s^I(\beta)$  for  $k_2 < k_1$ . As both profit functions are monotone decreasing in  $k_1$ , one can verify whether they cross or not by solving  $\sqrt{\pi_s^I(\beta)|_{k_2=k_1}} = \sqrt{\pi_s^B(0)}$ . We obtain  $\tilde{k}_1(\beta) = \frac{1}{72} (42 - (2\sqrt{3}+3)\beta(5\beta-2))$  such that  $\pi_s^B(0) < \pi_s^I(\beta)$  for  $k_1 < \tilde{k}_1$ .

Next, if  $\tilde{k}_1 \geq k_1$ , there should exist a threshold  $\tilde{k}_2$  such that  $\pi_s^I(\beta) > \pi_s^B(0)$  for  $k_2 < \tilde{k}_2$ . We equate the positive roots of  $\pi_s^I(\beta)$  and  $\pi_s^B(0)$ :

$$\Delta \triangleq \sqrt{\pi_s^I(\beta)} - \sqrt{\pi_s^B(0)} = \frac{6\sqrt{6}((\beta-1)(5\beta-7)k_2 + k_1((\beta-1)(5\beta-7) - 24k_2))}{(7-5\beta)^2(\beta^2 + 6k_2 - 1) + 6k_1((7-5\beta)^2 - 144k_2)} - \frac{12\sqrt{6}k_1}{7(4\sqrt{3}-7) - 48(\sqrt{3}-3)k_1}.$$

We notice that the first term is monotonically decreasing in  $k_2$ . So is  $\Delta$ . Then, there exists a unique solution  $\tilde{k}_2(k_1|\beta)$  such that  $\pi_s^*(0) \leq \pi_s^*(\beta)$  for  $k_2 \leq \tilde{k}_2(k_1|\beta)$ . Combining with the upper bound of Case 2, the supplier is better off with cross-licensing for  $k_2 < \min\{\tilde{k}_2(k_1|\beta), \hat{k}_2(k_1|0)\}$ .

(iii) Finally, suppose that  $\hat{k}_2(k_1|0) \leq k_2 < k_1$ . This region is nonempty if and only if  $\hat{k}_2(k_1|0) < k_1$ , or equivalently  $\frac{7}{12} < k_1$ . The corresponding supplier's profit function is  $\pi_s^I$  regardless of the cross-licensing decision. Although  $\pi_s^I$  is complicated, we note that it has a positive square root. We compare the positive square roots of  $\pi_s^I(\beta)$  to  $\pi_s^I(0)$ . Specifically, we solve the following to obtain the threshold value for  $k_2$ :

$$\begin{aligned} \sqrt{\pi_s^I(\beta)} - \sqrt{\pi_s^I(0)} &= \frac{6\sqrt{6}((\beta-1)(5\beta-7)k_2 + k_1((\beta-1)(5\beta-7) - 24k_2))}{(7-5\beta)^2(\beta^2+6k_2-1) + 6k_1((7-5\beta)^2 - 144k_2)} \\ &\quad - \frac{6\sqrt{6}(7k_2 + k_1(7-24k_2))}{49(6k_2-1) + 6k_1(49-144k_2)}. \end{aligned}$$

While the above equation is involved, it can be reduced to a quadratic equation with respect to  $k_2$  with a positive coefficient for  $k_2^2$ . Moreover, one can verify that  $(\sqrt{\pi_s^I(\beta)} - \sqrt{\pi_s^I(0)})|_{k_2=0} < 0$ . So there exists a root  $\underline{k}_2(k_1|\beta)$  such that  $\pi_s^I(\beta) > \pi_s^I(0)$  for  $k_2 > \underline{k}_2(k_1|\beta)$ .

$$\underline{k}_2(k_1|\beta) = \frac{25\beta^3(24k_1-7) + 70\beta^2(7-24k_1) - \sqrt{(7(\beta-1)(5\beta-7)(5\beta-2) - A - B + C}}{24(-35\beta + 12(5\beta-2)k_1 + 49)},$$

where  $A = 24k_1(\beta(5\beta(5\beta-14) + 59) + 6(2-5\beta)k_1 + 21)^2$ ,  $B = 336(5\beta-7)k_1(5\beta^2 - 7\beta - 12k_1 + 2)(-35\beta + 12(5\beta-2)k_1 + 49)$ , and  $C = \beta(24(59 - 30k_1k_1 - 413) + 72k_1(4k_1 + 7) + 98)$ . In addition, if  $\beta \geq \frac{2}{5}$ , then  $\underline{k}_2(k_1|\beta) \geq k_1$ . In such a case,  $k_2 < k_1 \leq \underline{k}_2(k_1|\beta)$ , which means that  $\pi_s^I(0) \geq \pi_s^B(\beta)$  and the supplier is worse off with cross-licensing.  $\square$

**Proof of Corollary 2.** Suppose that  $k_2 \leq \hat{k}_2(k_1|\beta)$ . Then, the derivative of  $\pi_s^B$  around  $\beta = 0$  is

$$\frac{\partial \pi_s^B}{\partial \beta} \Big|_{\beta=0} = -\frac{3456k_1^2(24(2\sqrt{3}-3)k_1 - 4\sqrt{3} + 7)}{(48(\sqrt{3}-3)k_1 - 28\sqrt{3} + 49)^3}.$$

One can show the above equation is positive. Next, if  $\hat{k}_2(k_1|\beta) < k_2$ ,  $\pi_s = \pi_s^I$ . Similarly, for  $k_1 \approx k_2$ ,

$$\lim_{k_2 \rightarrow k_1} \frac{\partial \pi_s^I}{\partial \beta} \Big|_{\beta=0} = \frac{3456k_1^2}{(72k_1-7)^3} > 0.$$

Next, consider  $\beta = 1$  and recall that  $M_2$  can be better off with cross-licensing for  $\hat{k}_2(k_1|\beta) < k_2$  and  $k_1 < k_1(k_2|\beta)$ . It implies that  $M_2$  is better off with cross licensing for some large  $k_1 \approx k_2 > \hat{k}_2(k_1|\beta)$ . We will show that the supplier is not under the same condition. If  $k_1 = k_2$ , then the supplier's profit can be greatly simplified to

$$\pi_s^I(\beta)_{k_1=k_2} = \frac{864k_1^2}{((\beta+1)(5\beta-7) + 72k_1)^2}.$$

Then,  $\pi_s^I(0)|_{k_1=k_2} = \frac{864k_1^2}{(72k_1-7)^2}$  and  $\pi_s^I(1)|_{k_1=k_2} = \frac{864k_1^2}{(72k_1-4)^2}$ , showing that  $\pi_s^I(0)|_{k_1=k_2} > \pi_s^I(1)|_{k_1=k_2}$ .  $\square$

**Proof of Proposition 5.** Consider  $T_1$  with respect to  $\beta$ . We examine its derivatives for  $k_2 \leq \hat{k}_2(k_1|\beta)$  and  $\hat{k}_2(k_1|\beta) < k_2$  sequentially.

1.  $k_2 \leq \hat{k}_2(k_1|\beta)$  or equivalently  $\beta \leq \hat{\beta}(k_1, k_2)$

Recall that  $T_1^* = T_1^B$ . Then,

$$\frac{\partial T_1^B}{\partial \beta} = -(7-4\sqrt{3}) \frac{48(5\beta(\sqrt{3}\beta + 2\sqrt{3} - 6) - 19\sqrt{3} + 36)k_1 - (7-4\sqrt{3})(\beta-1)^2(7-5\beta)^2}{((4\sqrt{3}-7)(\beta-1)(\beta+1)(5\beta-7) - 48(\sqrt{3}\beta + \sqrt{3}-3)k_1)^2}.$$

Notice that if  $\beta < \frac{1}{5}(5\sqrt{3} - \sqrt{5(39 - 22\sqrt{3})} - 5)$ , the numerator is an increasing linear function in  $k_1$ . Since  $\hat{\beta}(k_1, k_2)$  is increasing in  $k_1$  and  $\lim_{k_1 \rightarrow \infty} \hat{\beta}(k_1, k_2) = \frac{6}{5} - \frac{\sqrt{240(39 - 22\sqrt{3})k_2 - 40\sqrt{3} + 73}}{5(4\sqrt{3} - 5)} < \frac{1}{5}(5\sqrt{3} - \sqrt{5(39 - 22\sqrt{3})} - 5)$  for  $\frac{49}{144} < k_2$ , the numerator is indeed an increasing linear function for  $\beta < \hat{\beta}(k_1, k_2)$ . This also implies that the numerator is positive for  $k_1 > \frac{(7-4\sqrt{3})(7-5\beta)^2(\beta-1)^2}{48(5\beta(\sqrt{3}\beta+2\sqrt{3}-6)-19\sqrt{3}+36)} \triangleq \underline{k}_1$ . Since we assume that  $\frac{49}{144} < k_2 < k_1$ , if we show  $\underline{k}_1 \leq \frac{49}{144}$ , then we prove that the numerator is positive and  $T_1^B$  is decreasing in  $\beta$ . By differentiating  $\underline{k}_1$  with respect to  $\beta$ , one can show that  $\underline{k}_1$  is increasing in  $\beta$ . Also,  $\lim_{k_1 \rightarrow \infty} \hat{\beta}(k_1, k_2)$  has the maximum at  $k_2 = \frac{49}{144}$ . Thus,  $\underline{k}_1$  has the maximum at  $\beta = \lim_{k_1 \rightarrow \infty} \hat{\beta}(k_1, 49/144)$ , which is approximately evaluated as  $0.172 < \frac{49}{144}$ , showing that  $T_1^B$  is decreasing in  $\beta \in [0, \hat{\beta}(k_1, k_2)]$ .

2.  $\hat{k}_2(k_1|\beta) < k_2 < k_1$  or equivalently  $\hat{\beta}(k_1, k_2) < \beta$

We note that

$$\hat{\beta}(k_1, k_2) \begin{cases} \leq 0 & \text{if } \hat{k}_2(k_1|0) \leq k_2, \\ > 0 & \text{otherwise.} \end{cases}$$

Thus, the lower bound of  $\beta$  depends on  $k_1$  and  $k_2$ . Given this setup, we examine the derivative of  $T_1^* = T_1^I$  with respect to  $\beta$ .

$$\frac{\partial T_1^I}{\partial \beta} = \frac{f(\beta)}{((7-5\beta)^2(\beta^2+6k_2-1)+6k_1((7-5\beta)^2-144k_2))^2},$$

where  $f(\beta) = (\beta-1)^2(7-5\beta)^4 - 6(7-5\beta)^2k_2(\beta(55\beta-98)+60k_2+39) - 6k_1((7-5\beta)^4 - 12(5\beta-7)(155\beta-169)k_2+8640k_2^2)$ . We want to show that  $f$  is decreasing in  $\beta$  by evaluating  $f$  and  $f_n \triangleq \frac{\partial^n f(\beta)}{\partial \beta^n}$  at the boundaries of  $\beta$ . In what follows, we omit complicated evaluated expressions if they can be verified.

- (a) Evaluation of  $f_4$

Notice that  $f_4$  is a convex quadratic equation for  $\beta$ . Although  $f_4(0)$  and  $f_4(\hat{\beta}(k_1, k_2))$  can be either negative or positive,  $f_4(1) < 0$ . Then,  $f_3$  is either decreasing or increasing and then decreasing in  $\beta$ .

- (b) Evaluation of  $f_3$

As we verify that  $f_3(0) \geq 0$ ,  $f_3(\hat{\beta}(k_1, k_2)) \geq 0$ , and  $f_3(1) \geq 0$ ,  $f_3 \geq 0$  and  $f_2$  is increasing in  $\beta$ .

- (c) Evaluation of  $f_2$

Similar to  $f_4$ ,  $f_2(0)$  and  $f_2(\hat{\beta}(k_1, k_2))$  can be either negative or positive, but we verify  $f_2(1) > 0$ . Then,  $f_1$  is either increasing or decreasing and then increasing in  $\beta$ .

- (d) Evaluation of  $f_1$

We verify that  $f_1(0) < 0$ ,  $f_1(\hat{\beta}(k_1, k_2)) < 0$ , and  $f_1(1) < 0$ . Hence,  $f_1 < 0$  and  $f$  is decreasing in  $\beta$ .

- (e) Evaluation of  $f$

We verify  $f(1) < 0$ . We can show that  $\hat{k}_2(k_1|0) < k_1$  if and only if  $k_1 > \frac{7}{12}$ . So if  $k_1 < \frac{7}{12}$ , then  $k_2 < k_1 < \hat{k}_2(k_1|0)$ . If  $k_2 \leq \hat{k}_2(k_1|0)$ , the lower bound of  $f(\cdot)$  is  $\hat{\beta}(k_1, k_2)$ . We further verify that  $f(\hat{\beta}(k_1, k_2)) > 0$  for  $k_2 \leq \hat{k}_2(k_1|0)$ . In addition, if  $k_2 > \hat{k}_2(k_1|0)$ , which is only possible if  $k_1 > \frac{7}{12}$ ,

then the lower bound of  $\beta$  is 0. However,  $f(0) = -51840k_1k_2^2 - 17640k_2^2 + 85176k_1k_2 - 11466k_2 - 14406k_1 + 2401$  is a concave quadratic function for  $k_2$  and may or may not be less than 0. we verify that  $f(0)|_{k_2=\hat{k}_2(k_1|0)} > 0$  if and only if  $k_1 > \frac{7}{12}$ . So in this case, there exists a solution of  $f(0) = 0$  for  $k_2$ , which is greater than  $\hat{k}_2(k_1|0)$ , denoted as  $\bar{k}_2 = \frac{7(\sqrt{24k_1(100806k_1-58387)+170569+2028k_1-273})}{120(144k_1+49)} > \hat{k}_2(k_1, 0)$ , such that  $f(0) > 0$  if and only if  $k_2 < \hat{k}_2(k_1|0)$ . To summarize, the sign of  $f(\cdot)$  at the low bound of  $\beta$  is

$$f(\underline{\beta}) = \begin{cases} f(\hat{\beta}(k_1, k_2)) > 0 & \text{if } \hat{k}_2(k_1|\beta) < k_2 < \hat{k}_2(k_1|0), \\ f(0) > 0 & \text{if } \hat{k}_2(k_1|0) \leq k_2 \leq \bar{k}_2, \\ f(0) \leq 0 & \text{otherwise.} \end{cases}$$

$$= \begin{cases} > 0 & \text{if } \hat{k}_2(k_1|\beta) \leq k_2 \leq \bar{k}_2, \\ \leq 0 & \text{otherwise.,} \end{cases}$$

Then considering that  $f$  decreases in  $\beta$  and  $f(1) < 0$ , the result follows.

The proof of how  $T_2$  changes in  $\beta$  is similar and thus omitted.  $\square$

**Proof for Proposition 6.** Taking derivative of  $(T_1^*(\beta) + T_2^*(\beta)) - (T_1^*(0) + T_2^*(0))$  with respect to  $k_2$ , we obtain the result as stated in (i).

Comparing the total level of innovation  $T_1 + T_2$ , we get that cross licensing increases the total innovation when  $k_2 < \hat{k}_2(k_1|\beta)$ , and lowers the total innovation when  $k_2 \geq \hat{k}_2(k_1|0)$ . For  $\hat{k}_2(k_1|\beta) \leq k_2 < \hat{k}_2(k_1|0)$ , because  $(T_1^*(\beta) + T_2^*(\beta)) - (T_1^*(0) + T_2^*(0))$  is decreasing in  $k_2$ , there must exists a threshold, which we denote as  $\kappa(k_1|\beta)$ , where  $\hat{k}_2(k_1|\beta) \leq \kappa(k_1|\beta) < \hat{k}_2(k_1|0)$ , such that cross-licensing lowers the total innovation  $T_1 + T_2$  if and only if  $k_2 > \kappa(k_1|\beta)$ .

Finally, We verify that when  $\beta = 1$  the total level of innovation  $T_1 + T_2$  is always lower with cross-licensing, by comparing the total level of innovation, and get the result in (c).  $\square$

**Proof of Proposition 7.** We prove the profits of  $M_1$  and  $M_2$  sequentially.

(i) Consider  $M_1$ 's profit first. If  $k_2 < \hat{k}_2(k_1|\beta)$ , we verify that  $\pi_1^B(\beta) > \pi_1^B(0)$ . We next consider the case when  $k_2 \geq \hat{k}_2(k_1|\beta)$ . First, we can show that  $T_2^I(\beta)$  decreases in  $\beta$ , so  $T_2^I(\beta) < T_2^I(0)$  for any  $\beta > 0$ . We next verify that without cross-licensing, i.e.,  $\beta = 0$ , manufacturer 1's profit decreases in  $T_2$ . Therefore,  $\pi_1(T_1^*(0), T_2^I(\beta)|0) > \pi_1(T_1^*(0), T_2^I(0)|0)$ . Then, given fixed  $T_1$  and  $T_2$ , we can show that manufacturer 1's profit is always higher with cross-licensing. So  $\pi_1(T_1^*(0), T_2^I(\beta)|\beta) > \pi_1(T_1^*(0), T_2^I(\beta)|0)$ . Then we have,  $\pi_1(T_1^*(\beta), T_2^I(\beta)|\beta) \geq \pi_1(T_1^*(0), T_2^I(\beta)|\beta) > \pi_1(T_1^*(0), T_2^I(\beta)|0) > \pi_1(T_1^*(0), T_2^I(0)|0)$ .

Next, consider the derivative of  $\pi_1$  with respect to  $\beta$ . One can show that the derivative evaluated around  $\beta = 1$  is negative.

$$\frac{\partial}{\partial \beta} \pi_1(\beta)|_{\beta=1} = -\frac{k_1k_2(-36k_1^2 + k_1 + 15(1 - 36k_1)k_2^2 + (9k_1 + 1)(24k_1 - 1)k_2)}{3(k_2 + k_1(1 - 36k_2))^3}$$

(ii) Now, we focus on  $M_2$ 's profit. Recall that  $\pi_2^*(T_1, T_2|\beta) = \Pi_2^*(T_1, T_2|\beta) - k_2T_2^2 = \frac{1}{144}((5\beta - 7)T_2 + (5 - 7\beta)T_1 - 2)^2 - k_2T_2^2$ , of which the first term is revenue and the second term is innovation investment. First, assume that  $k_2 < \hat{k}_2(k_1|\beta)$ . If the second term decrease faster than the first term, then  $\pi_2$  is decreasing. We compare the derivatives of their squares,  $\frac{\partial}{\partial \beta} \sqrt{\Pi_2(T_1^B, T_2^B|\beta)} - \frac{\partial}{\partial \beta} \sqrt{k_2T_2^{B2}}$ , of which sign

is equivalent to  $f(k_1) \triangleq 24k_1((936 - 528\sqrt{3})k_1 - (48\sqrt{3} - 83)(\beta - 1)^2(5\beta - 1)) + \sqrt{k_2}((56\sqrt{3} - 97)(\beta - 1)^2(7 - 5\beta)^2 + 48k_1(\beta((615 - 355\sqrt{3})\beta + 554\sqrt{3} - 960) + 144(\sqrt{3} - 2)k_1 - 147\sqrt{3} + 255))$ . While  $f$  is complicated, it is a concave quadratic function in  $k_1$ . We notice that its maximum exists between 0 and  $\frac{49}{144}$ , implying that  $f$  is decreasing in  $\frac{49}{144} < k_1$ . Since  $\frac{49}{144} < k_2$ ,  $f(k_2)|_{k_2=49/144} < 0$  is sufficient for  $f < 0$  for  $k_2 < k_1$ . One can verify that  $f(k_2)|_{k_2=49/144}$  is decreasing in  $\beta \in [0, 1]$  and  $f(k_2)|_{k_2=49/144, \beta=0} < 0$ .

Then, suppose that  $k_2 > \hat{k}_2(k_1|\beta)$ . Due to the analytical complexity, the general comparative statistics of  $\pi_2$  with respect to  $\beta$  cannot be shown. For  $k_2 > \hat{k}_2(k_1|0) > \hat{k}_2(k_1|\beta)$ , however, we can show that there exists a threshold  $k_1$  under which  $M_2$  can be better off with cross-licensing.

When  $k_2 > \hat{k}_2(k_1|0) > \hat{k}_2(k_1|\beta)$ , both manufacturers invest  $T_i^I$  regardless of  $\beta$ , and  $M_2$ 's profit becomes  $\pi_2^I(\beta)$ . We notice that  $\pi_2^I(\beta)$  has a square fraction term with respect to  $k_1$ , which makes  $\sqrt{\pi_2^I(0)} - \sqrt{\pi_2^I(\beta)}$  a quadratic equation in  $k_1$ . Thus, there exists a positive solution  $\bar{k}_1(k_2|\beta)$  under which  $\sqrt{\pi_2^I(0)} < \sqrt{\pi_2^I(\beta)}$ .  $\square$

**Proof of Corollary 3.** Equation (5) shows that consumer surplus is proportional to the supplier's profit under a duopoly as given in Lemma 1. Therefore, the impact of cross-licensing on consumer surplus is the same as that on the supplier's profit, which is stated in Proposition 4.  $\square$

**Proof of Proposition 8.** Let us define  $\Delta_f(\beta)$  as the profit difference with and without cross-licensing of which effectiveness is  $\beta$  for the supply chain entity  $f$ . Then, social welfare difference is the sum of the differences of consumer surplus and all firms' profits, which can be expressed as

$$\Delta_{SW}(\beta) = \Delta_1(\beta) + \Delta_2(\beta) + \Delta_s(\beta) + \Delta_{CS}(\beta).$$

Recall that Lemma 1 shows that each firm's profit function is a square of a linear combination  $T_1$  and  $T_2$ . If the downstream is either a boundary duopoly ( $\frac{49}{144} < k_2 < \hat{k}_2(k_1|\beta)$ ) or an interior duopoly ( $\hat{k}_2(k_1|0) \leq k_2 < k_1$ ) regardless of cross-licensing, Proposition 2 shows that both  $T_1$  and  $T_2$  are fractions with the same denominator. It implies that although  $\Delta_{SW}$  is algebraically complicated, it is a difference of two complicated fractions with positive denominators. However, if the downstream structure depends on cross-licensing ( $\hat{k}_2(k_1|\beta) \leq k_2 < \hat{k}_2(k_1|0)$ ), namely an interior duopoly with cross-licensing but a boundary one without it, then  $\Delta_{SW}$  is a linear combination of four complicated fractions, hindering us from analyzing it. As such, we examine when  $\Delta_{SW}(\beta) > 0$  for  $\frac{49}{144} < k_2 < \hat{k}_2(k_1|\beta)$  and  $\hat{k}_2(k_1|0) \leq k_2 < k_1$ , sequentially.

- (i)  $\frac{49}{144} < k_2 < \hat{k}_2(k_1|\beta)$  In this case, the downstream is a boundary duopoly regardless of cross-licensing. Notice that the denominator of  $T_1^B$  and  $T_2^B$  is identical to  $d^B(\beta) \triangleq (4\sqrt{3} - 7)(\beta - 1)(\beta + 1)(5\beta - 7) - 48(\sqrt{3}\beta + \sqrt{3} - 3)k_1$ . Thus, each entity's profit function with cross-licensing can be expressed as a fraction with the same denominator, i.e.,  $(d^B(\beta))^2$ . This applies to the no cross-licensing case by replacing  $\beta$  with 0. In short,  $\Delta_{SW}(\beta)$  is a difference of two complicated fractions with positive denominators  $(d^B(\beta))^2$  and  $(d^B(0))^2$ .

After multiplying both denominators to  $\Delta_{SW}(\beta)$ , we have  $g \triangleq (48(\sqrt{3} - 3)k_1 - 28\sqrt{3} + 49)^2((56\sqrt{3} - 97)(\beta - 1)^2(7 - 5\beta)^2k_2 - 288k_1^2((48\sqrt{3} - 89)(\beta - 1)^2 + 24(7 - 4\sqrt{3})k_2) + (\beta - 1)(5\beta - 7)k_1((56\sqrt{3} - 97)(\beta - 1)(5\beta - 7) + 96(45 - 26\sqrt{3})k_2)) - (288(24(4\sqrt{3} - 7)k_2 - 48\sqrt{3} + 89)k_1^2 - 7(96(26\sqrt{3} - 45)k_2 -$

$392\sqrt{3}+679)k_1+49(56\sqrt{3}-97)k_2)((4\sqrt{3}-7)(\beta-1)(\beta+1)(5\beta-7)-48(\sqrt{3}\beta+\sqrt{3}-3)k_1)^2$ . Although  $g$  is algebraically complicated, one can verify that  $g$  is decreasing in  $k_2$  and  $g > 0$  for  $\frac{49}{144} < k_2 < \hat{k}_2(k_1|\beta)$ , proving the desired result.

(ii)  $\hat{k}_2(k_1|0) \leq k_2 < k_1$

As noted, the downstream is an interior duopoly regardless of cross-licensing. We use an approach similar to the first case. Since the denominator of  $T_1^I$  and  $T_2^I$  are identical and equals  $d^I(\beta) \triangleq (7-5\beta)^2(\beta^2+6k_1+6k_2-1)-864k_1k_2$ , each entity's profit function with cross-licensing can be expressed as a fraction with the same denominator, i.e.,  $(d^I(\beta))^2$ . Similar to the previous case,  $\Delta_{SW}(\beta)$  is a difference of two complicated fractions with positive denominators,  $(d^I(\beta))^2$  and  $(d^I(0))^2$ . After multiplying both denominators to  $\Delta_{SW}(\beta)$ , we have the numerator  $h \triangleq (-294k_2+6k_1(144k_2-49)+49)^2((\beta-1)^2-(7-5\beta)^2)k_2((7-5\beta)^2-432k_2)-144k_1^2(-3(\beta-1)^2(7-5\beta)^2+(5\beta-7)(125\beta-127)k_2-1440k_2^2)-(5\beta-7)k_1((\beta-1)^2(5\beta-7)^3+48k_2((375\beta-381)k_2-(\beta-1)(5\beta-7)(17\beta-19)))-(144(k_2(1440k_2-889)+147)k_1^2-7(48k_2(381k_2-133)+343)k_1+49k_2(432k_2-49))((7-5\beta)^2(\beta^2+6k_2-1)+6k_1((7-5\beta)^2-144k_2))^2$ .

We verify that  $h|_{k_2=\hat{k}_2(k_1|0)} < 0$  and  $h|_{k_2=k_1} \geq 0$ , suggesting the existence of thresholds for  $\Delta_{SW} > 0$ . However, it is unclear whether  $h = 0$  has a unique solution. To show the uniqueness, we focus on the key result by omitting some tedious algebras, as  $h$  is algebraically complicated. Let us define  $h_n$  as the  $n^{th}$  derivative of  $h$  with respect to  $k_2$ . That is,

$$h_4(k_1) \triangleq \frac{\partial^4 h}{\partial k_2^4} = 124416\beta(588(6\beta-7)(7-5\beta)^2+k_1 \cdot m(k_1, \beta)),$$

where  $m(k_1, \beta) \triangleq 288k_1\beta(5\beta(455\beta-1684)+17874)+360(22-25\beta)k_1-13748-7(5\beta-7)(\beta(14365\beta-36141)+34202)$ . Suppose that  $h_4 \geq 0$ , implying that  $h_3$  is weakly increasing. One can show that  $h_3|_{k_2=\hat{k}_2(k_1|0)} \geq 0$ , implying that  $h_2$  is also weakly increasing. Although it can be shown that  $h_2|_{k_2=k_1} \geq 0$ , we lose tractability for the sign of  $h_2|_{k_2=\hat{k}_2(k_1|0)}$ . Then, there are two cases:

- (a) Assume that  $h_2|_{k_2=\hat{k}_2(k_1|0)} < 0$ , implying that  $h_1$  is decreasing and then increasing. Moreover, it can be shown that  $h_1|_{k_2=\hat{k}_2(k_1|0)} < 0$ , showing that  $h_1$ 's sign changes once from negative to positive. This means  $h$  is decreasing from negative then increasing to positive, showing the unique solution of  $h = 0$ .
- (b) Assume that  $h_2|_{k_2=\hat{k}_2(k_1|0)} \geq 0$ , implying that  $h_1$  is weakly increasing.  $h_1$ 's sign may remain as positive or change once from negative to positive. If  $h_1$ 's sign is positive,  $h$  is increasing from negative to positive, proving the unique solution. Even if  $h_1$ 's sign changes from negative to positive, there exists a unique solution for  $h = 0$ , as it was shown in the previous case.

Therefore, there must be a threshold for  $k_2$  under which  $\Delta_{SW}(\beta) < 0$  and over which  $\Delta_{SW}(\beta) > 0$ .

Next, we analyze when  $h_4 \geq 0$ . We note that  $\hat{k}_2(k_1|0) < k_1$  holds for  $\frac{7}{12} < k_1$ . If  $\beta < \frac{22}{25}$ ,  $m$  is a convex function and its inflection point is greater than  $\frac{7}{12}$ . This implies that  $k_1 \cdot m(k_1, \beta)$  is decreasing and then increasing to positive in  $k_1$ . Although  $588(6\beta-7)(7-5\beta)^2 < 0$ ,  $k_1 \cdot m(k_1, \beta)$  becomes large enough to make  $h_4 > 0$  for sufficiently high  $k_1$ . However, it is unclear if  $h_4 > 0$  for small  $k_1$ .

$$h_4\left(\frac{7}{12}\right) = 12700800\beta(5\beta(\beta(35\beta-52)-65)-1162),$$

which is less than 0 for  $0 < \beta < 22/25$ . Thus,  $h_4$  is increasing from negative to positive in  $k_1$ , proving that there exists a threshold  $\underline{k}_1^{SW}(\beta)$  over which  $h_4 > 0$ .

If  $h_4 < 0$ , we lose tractability due to the complexity of the polynomial. Although we cannot show a general result, we can show that  $\Delta_{SW}(\beta)$  is negative for a special case. Assume  $\beta = 1$  and  $k_1$  is large enough, assuring  $h_4 < 0$ . Then,

$$\lim_{k_1 \rightarrow \infty} \Delta_{SW}(1) = -\frac{3(k_2(72k_2(360k_2 + 673) - 14497) + 196)}{(5184k_2^2 - 1908k_2 + 49)^2} < 0.$$

As the next proof show,  $\Delta_{SW}(1)$  is indeed negative.

(iii)  $\beta = 1$

We note that  $\hat{k}_2(k_1|1) = 0$  implies that the downstream is an interior duopoly with cross-licensing regardless of  $k_2$ . However, it may or may not be an interior duopoly without cross-licensing, contingent on  $k_2$ .

First, consider that  $\hat{k}_2(k_1|0) \leq k_2$  such that the downstream is an interior duopoly regardless of cross-licensing. Then,  $\Delta_{SW}(1)$  is a fraction, where the numerator is a polynomial of degree 4 in  $k_1$  and  $k_2$ ,  $-108(k_2(72k_2(360k_2 + 673) - 14497) + 196)k_1^4 + (2401 - 36k_2(9k_2(48k_2(180k_2 - 1091) + 7651) + 6419))k_1^3 + 2k_2(2401 - 162k_2(k_2(16152k_2 + 7651) - 1372))k_1^2 + 14k_2^2(18k_2(6213k_2 - 917) + 343)k_1 + 49k_2^3(49 - 432k_2)$ , and the denominator is the product of two square terms,  $(k_2 + k_1(1 - 36k_2))^2(-294k_2 + 6k_1(144k_2 - 49) + 49)^2$ . Thus, the numerator's sign determines the sign of  $\Delta_{SW}(1)$ . Although it is tedious, one can show that the numerator is decreasing in  $k_1$ , where its maximum at  $k_1 = k_2$  is negative for  $\hat{k}_2(k_1|0) \leq k_2$ .

Next, suppose that  $k_2 < \hat{k}_2(k_1|0)$ . The downstream is a boundary duopoly without cross-licensing. Similar to the previous case,  $\Delta_{SW}(1)$  is a fraction, where the numerator is a polynomial of degree 4 in  $k_2$  and degree 3 in  $k_1$ , and the denominator is the product of two square terms. It can be also verified that the numerator is increasing in  $k_2$ , where its maximum at  $k_2 = k_1$  is negative for  $k_2 < \hat{k}_2(k_1|0)$ .  $\square$

**Proof of Corollary 4.** We synthesize Propositions 4 and 8 to derive the desired results. For  $\frac{49}{144} < k_2 < \hat{k}_2(k_1|\beta)$ , Proposition 4(i) and Proposition 8(i) show that cross-licensing always benefits both the supplier and the social welfare. For  $\hat{k}_2(k_1|0) \leq k_2$ , Proposition 4(iii) shows that cross-licensing benefits the supplier if  $\underline{k}_2(k_1|\beta) \leq k_2$ . It also implies that if  $\hat{k}_2(k_1|0) \leq k_2 < \underline{k}_2(k_1|\beta)$ , the supplier will not impose cross-licensing. According to Proposition 8(ii), enforcing cross-licensing increases social welfare if  $\underline{k}_2^{SW}(k_1|\beta) \leq k_2 < \underline{k}_2(k_1|\beta)$  and  $h_4(k_1) > 0$ .  $\square$

**Proof of Lemma 2.** It follows the same proof of Lemma 1.  $\square$

**Proof of Proposition 9.** As the proof closely follows the same proof of Proposition 2 with  $Q_{is}$  and  $r_s^*$ , we outline the key differences. First, define  $T_{is}^I$  and  $T_{is}^B$  which correspond to  $T_i^I$  and  $T_i^B$  in Proposition 2. It is straightforward to show both  $T_{is}^I = (1 + T_s)T_i^I$  and  $T_{is}^B = (1 + T_s)T_i^B$ . Then, solving  $T_{is}^I = T_{is}^B$  results in the same threshold  $\hat{k}_2(k_1|\beta)$ . Hence, each manufacturer increases its investment by the same factor  $(1 + T_s)$ , i.e.,  $T_{is}^* = (1 + T_s)T_i^*$ . Indeed, even the monopoly investment  $T_{2s}^m$  is  $(1 + T_s)$  times more than  $T_2^m$ . One can also show the monopoly is infeasible.  $\square$

**Proof of Proposition 10.** Let us define the supplier's profit excluding its investment as  $A(\beta) \triangleq \frac{1}{24}(2 + (T_1^* + T_2^*)(1 + \beta))^2$ . Notice that (6) is a quadratic equation in  $T_s$  and  $A(\beta)$  is a constant in  $T_s$ . By solving the first order condition, one can obtain  $T_s^*(\beta) = \frac{A(\beta) + \sqrt{A(\beta)^2 + 48A(\beta)k_s}}{24k_s}$ . Then, the supplier's optimal profit is

$$\pi_s^*(A(\beta)) = \frac{A(\beta) \left( A(\beta)^{3/2} \sqrt{A(\beta) + 48k_s} + A(\beta)^2 + 24A(\beta)k_s - 288k_s^2 \right)}{6912k_s^2},$$

which is increasing in  $A(\beta)$ . Therefore, if  $A(\beta) \geq A(0)$ , then the supplier is better off with cross-licensing with  $T_s^*(\beta)$ .

We note that  $A(\beta)$  is indeed the supplier's optimal profit without the supplier's investment in Lemma 1 with the optimal manufacturer's investment. Recall that Proposition 4 is the result of  $A(\beta) \geq A(0)$ . Thus, the supplier's innovation investment does not alter the cross-licensing decision.  $\square$

**Proof of Proposition 11** We are interested in whether cross-licensing can achieve higher total innovation with the supplier's investment under wider conditions. According to Proposition 6(ii), if the supplier does not invest, i.e.,  $T_s = 0$ ,  $\Delta T = (T_1^*(\beta) + T_2^*(\beta)) - (T_1^*(0) + T_2^*(0)) \leq 0$  at  $k_2 \geq \kappa(k_1|\beta)$ . Now consider that  $T_s(\beta) > 0$ . According to Proposition 9, the optimal investment of a manufacturer  $i$  becomes  $T_{i_s}^* = (1 + T_s)T_i^*(\beta)$ . Define the total innovation with the supplier's investment  $T_s$  is  $T_T(\beta) \triangleq T_s(\beta) + (1 + T_s(\beta))(T_1^*(\beta) + T_2^*(\beta))$ . For  $k_2 \geq \kappa(k_1|\beta)$  we analyze the following total innovation difference:

$$\begin{aligned} T_T(\beta) - T_T(0) &= T_s(\beta) + (1 + T_s(\beta))(T_1^*(0) + T_2^*(0) + \Delta T) - (T_s(0) + (1 + T_s(0))(T_1^*(0) + T_2^*(0))) \\ &= (T_s(\beta) - T_s(0))(1 + T_1^*(0) + T_2^*(0)) + (1 + T_s(\beta))\Delta T. \end{aligned}$$

Remind that  $k_2 = \kappa(k_1|\beta)$  implies  $\Delta T = 0$  and  $T_s(\beta) > T_s(0)$  is sufficient for  $T_T(\beta) > T_T(0)$ . If  $k_2 > \kappa(k_1|\beta)$ ,  $\Delta T < 0$ . Since  $\Delta T$  is continuous,  $T_s(\beta) > T_s(0)$  is still sufficient to find  $\varepsilon > 0$  such that  $\Delta T$  is large enough to make  $T_T(\beta) > T_T(0)$  for  $k_2 < \kappa(k_1|\beta) + \varepsilon$ .

Next, we prove  $T_s^*(\beta) > T_s^*(0)$  for  $\kappa(k_1|\beta) \geq k_2 < \hat{k}_2(k_1|\beta)$ . With the results from Propositions 2 and 9, we obtain the supplier's optimal investment for  $k_2 < \hat{k}_2(k_1|\beta)$ :

$$T_s^{B*}(\beta) = - \frac{1728(\beta - 1)^2 k_1^2}{1728(\beta - 1)^2 k_1^2 - 2k_s((4\sqrt{3} - 7)(\beta - 1)(\beta + 1)(5\beta - 7) - 48(\sqrt{3}\beta + \sqrt{3} - 3)k_1)^2}.$$

One can verify that  $\frac{\partial T_s^{B*}(\beta)}{\partial \beta} |_{\beta=0} > 0$  for  $k_2 < \hat{k}_2(k_1|\beta)$ , showing that  $T_s^*(\beta) > T_s^*(0)$ .  $\square$
